# Supplementary material
Source: publisher site journal article supplement (https://www.dovepress.com/article/454325)
Supplement: Supplementary file 1 [file get_supplementary_file.php]

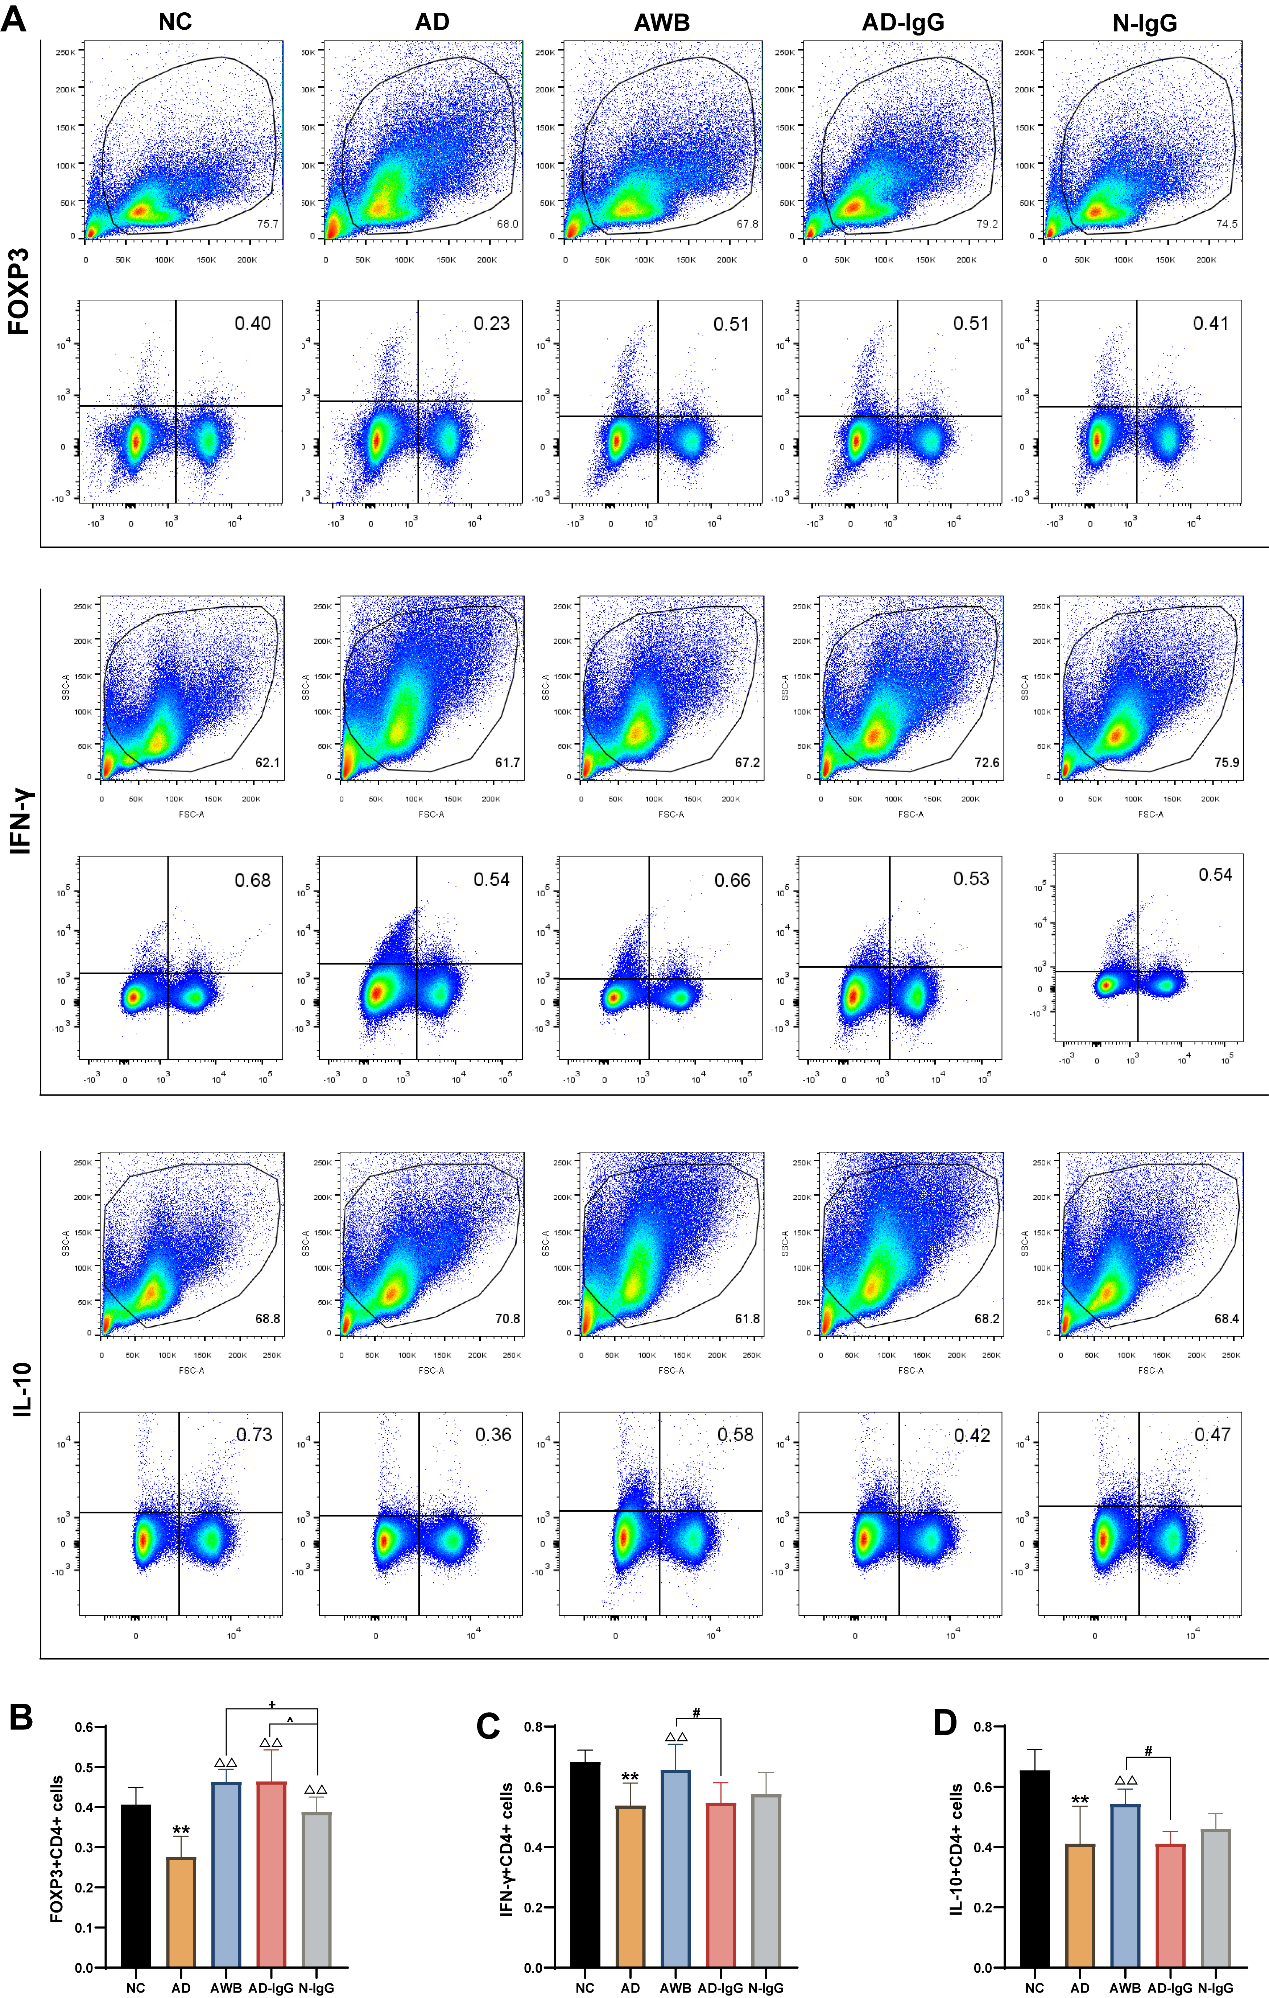


**Supplementary Figure 1 Effects of AWB acupoint injection on FoxP3+, IL-10+and IFN-γ+ CD4+T cells in Spleen of AD Mice (±*s*, n=6)**

(A) Flow cytometric profiles of FoxP3-, IL-10- and IFN-γ- producing CD4+T cells in murine spleen. (B) Proportion of cells with intracellular FoxP3, (C) IFN-γ, and (D)IL-10 in CD4+T cells. Data were expressed as means ± SEM (n = 6 in each group). In B-D, ***p* < 0.01 vs. NC group; △△*P*<0.01 vs. AD group. #*p*<0.05 AWB vs. AD-IgG group; ^ *p*<0.05 AD-IgG vs. N-IgG group; +*p*<0.05 AWB vs. N-IgG group.
